# Supplementary material for: A Statistically Rigorous Multi-Scale Texture Analysis Framework for 3D Spheroid Characterization: Temporal Autocorrelation Correction and Molecular Validation
Source: Research Square preprint supplement (doi:10.21203/rs.3.rs-8508394/v1), 2026-01-30
Supplement: Supplementary file 1 [file 0c8f581694b93239a0feb19d.xlsx]

## Sheet: Statistical Results
Rank	Feature Name	Feature Family	H1299: Fisher Score	H1299: Cohen's d	H1299: Bootstrap p-value	H1299: Bonferroni Significant (p<0.001351)	A549: Fisher Score	A549: Cohen's d	A549: Bootstrap p-value	A549: Bonferroni Significant (p<0.001351)	Fold-Difference (H1299 / A549)
1	detail_d2_variance	Wavelet	7.721	3.93	0.000100	Yes	0.24	0.694	0.001500	No	32.108
2	gabor_f0.1_max	Gabor	4.24	-2.912	0.000100	Yes	0	0.031	0.886411	No	8937.7
3	gabor_f0.05_max	Gabor	2.519	-2.245	0.000100	Yes	0.011	-0.15	0.481752	No	223.555
4	detail_v2_variance	Wavelet	2.05	2.025	0.000100	Yes	0.062	0.353	0.084992	No	32.984
5	detail_h2_variance	Wavelet	1.778	1.886	0.000100	Yes	0.071	0.377	0.064294	No	24.956
6	gabor_dominant_orientation	Gabor	1.44	-1.697	0.000100	Yes	0.078	0.396	0.056394	No	18.375
7	contrast_45deg	GLCM	1.027	1.433	0.000100	Yes	0.172	0.587	0.004500	No	5.969
8	contrast_135deg	GLCM	0.723	1.202	0.000100	Yes	0.265	0.727	0.000700	Yes	2.732
9	detail_d1_variance	Wavelet	0.699	1.183	0.000100	Yes	0.457	0.956	0.000200	Yes	1.531
10	contrast_90deg	GLCM	0.632	1.125	0.000100	Yes	0.359	0.847	0.000300	Yes	1.762
11	correlation_45deg	Other	0.616	-1.11	0.000100	Yes	0.004	0.088	0.671233	No	159.117
12	gabor_f0.2_max	Gabor	0.59	-1.086	0.000100	Yes	0.12	0.489	0.018798	No	4.932
13	contrast_0deg	GLCM	0.551	1.05	0.000100	Yes	0.315	0.794	0.000900	Yes	1.749
14	correlation_90deg	Other	0.506	-1.006	0.000100	Yes	0	-0.01	0.962704	No	10368.2
15	correlation_135deg	Other	0.481	-0.981	0.000100	Yes	0	0.006	0.978202	No	29056.2
16	correlation_0deg	Other	0.46	-0.959	0.000100	Yes	0.002	0.068	0.745225	No	199.333
17	gabor_response_ratio	Gabor	0.368	0.857	0.000200	Yes	0.224	0.669	0.000700	Yes	1.642
18	dissimilarity_45deg	Other	0.225	0.67	0.002000	No	0.014	0.166	0.428157	No	16.277
19	detail_h1_variance	Wavelet	0.221	0.665	0.002300	No	0.028	0.236	0.255774	No	7.935
20	detail_v1_variance	Wavelet	0.165	0.575	0.007299	No	0.227	0.674	0.002200	No	0.726
21	dissimilarity_135deg	Other	0.161	0.567	0.008999	No	0.032	0.251	0.225777	No	5.089
22	dissimilarity_90deg	Other	0.16	0.565	0.009099	No	0.049	0.314	0.135086	No	3.24
23	homogeneity_45deg	Other	0.138	-0.526	0.013299	No	0.002	-0.064	0.754325	No	67.781
24	dissimilarity_0deg	Other	0.118	0.486	0.020498	No	0.027	0.232	0.268973	No	4.387
25	homogeneity_135deg	Other	0.107	-0.463	0.027497	No	0.004	-0.095	0.646035	No	23.852
26	homogeneity_90deg	Other	0.1	-0.448	0.032897	No	0.008	-0.127	0.544046	No	12.498
27	energy_0deg	Other	0.091	0.427	0.040896	No	0.087	0.418	0.045095	No	1.041
28	energy_135deg	Other	0.085	0.413	0.048795	No	0.074	0.386	0.064194	No	1.144
29	energy_90deg	Other	0.083	0.407	0.051695	No	0.073	0.382	0.066093	No	1.137
30	energy_45deg	Other	0.079	0.398	0.057094	No	0.078	0.394	0.058494	No	1.019
31	homogeneity_0deg	Other	0.071	-0.376	0.071693	No	0.001	-0.036	0.859014	No	108.912
32	approximation_energy	Other	0.01	0.14	0.499150	No	0.085	0.412	0.050295	No	0.116
33	entropy_0deg	Other	0.004	-0.087	0.674433	No	0.008	-0.126	0.542146	No	0.475
34	entropy_135deg	Other	0.003	-0.074	0.718428	No	0.006	-0.112	0.586741	No	0.438
35	entropy_90deg	Other	0.002	-0.059	0.774823	No	0.005	-0.099	0.631337	No	0.363
36	entropy_45deg	Other	0.001	-0.048	0.818818	No	0.009	-0.131	0.526247	No	0.133
37	gabor_orientation_variance	Gabor	0	0.005	0.981602	No	0.004	-0.087	0.676732	No	0.003

## Sheet: Analysis Parameters
Parameter	Value
Bootstrap replicates	10,000
Block length	5 hours
Median decorrelation lag	4 hours
Effective DOF per condition	~12 (48h / 4h)
Bonferroni correction	α_adjusted = 0.05 / 37
Significance threshold	p < 0.001351
Number of features tested	37
H1299 significant features	17
A549 significant features	5
